# Supplementary material for: Preferential perovskite surface-termination induced high piezoresponse in lead-free in situ fabricated Cs3Bi2Br9-PVDF nanocomposites promotes biomechanical energy harvesting
Source: Royal Society of Chemistry journal article supplement (doi:10.1039/d3nr01517c), 2023-01-01
Supplement: d3nr01517c1.pdf [file d3nr01517c1.pdf]

## Supplementary Information

### Preferential Perovskite Surface-termination Induced High Piezoresponse in Lead-free *in-situ* Fabricated Cs<sub>3</sub>Bi<sub>2</sub>Br<sub>9</sub>-PVDF Nanocomposites Promotes Biomechanical Energy Harvesting

Aditi Sahoo<sup>1</sup>, Tufan Paul<sup>1</sup>, Ankan Nath<sup>2</sup>, Soumen Maiti<sup>3</sup>, Prabhat Kumar<sup>1</sup>, Prasenjit Ghosh<sup>2</sup>  
and Rupak Banerjee<sup>1, 4\*</sup>

<sup>1</sup>Department of Physics, Indian Institute of Technology Gandhinagar, Palaj, Gandhinagar 382355, India

<sup>2</sup>Department of Physics, Indian Institute of Science Education and Research, Dr. Homi Bhabha Road, Pune 411008, India

<sup>3</sup>St. Thomas Colleges of Engineering & Technology, Kolkata 700023, India

<sup>4</sup>K C Patel Centre for Sustainable Development, Indian Institute of Technology Gandhinagar, Palaj, Gandhinagar 382355, India

\*Corresponding author email: [rupakb@iitgn.ac.in](mailto:rupakb@iitgn.ac.in)

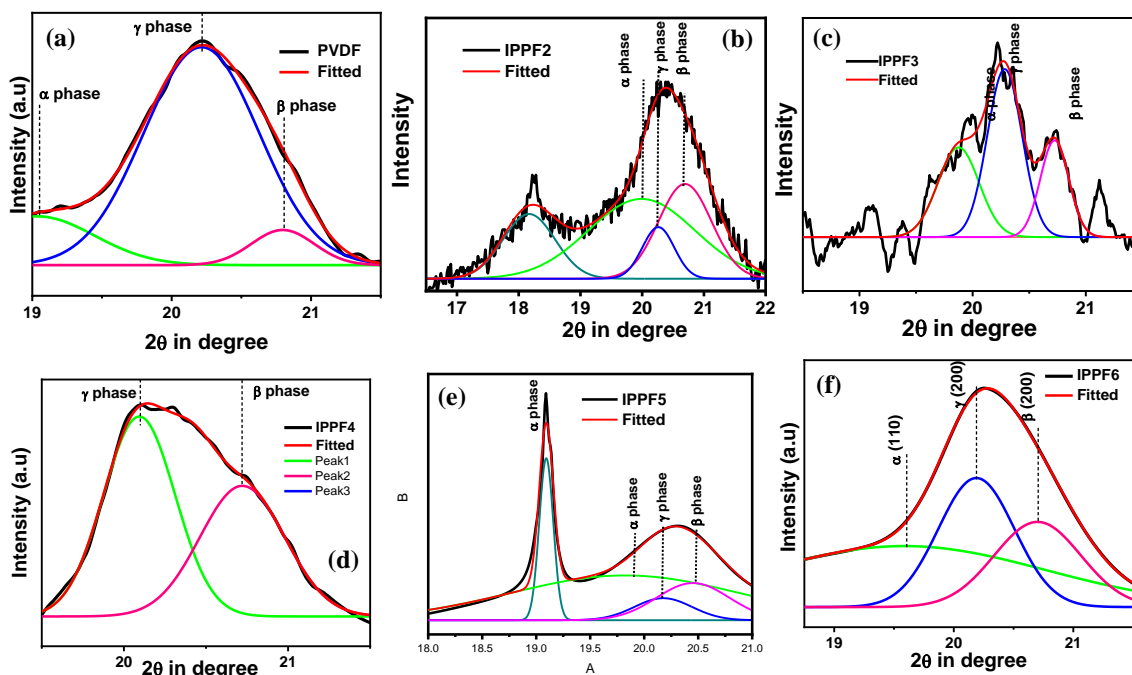

Figure S1: (a)-(f) The deconvoluted XRD peak profiles are showing the peaks corresponding to  $\alpha$ ,  $\beta$  and,  $\gamma$  phases in PVDF and all composite films.

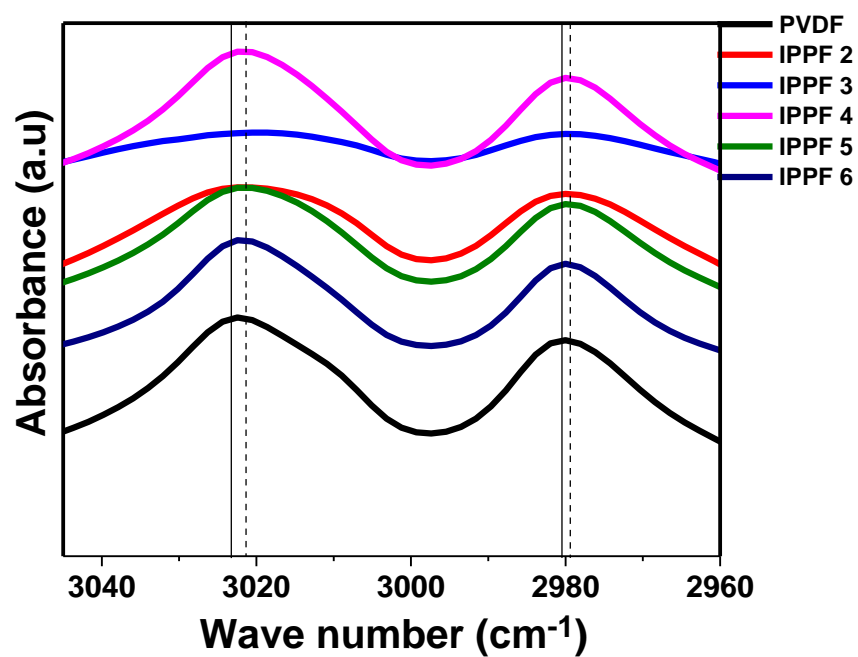

*Figure S2: Shift in FTIR stretching vibration of PVDF and all composite films.*

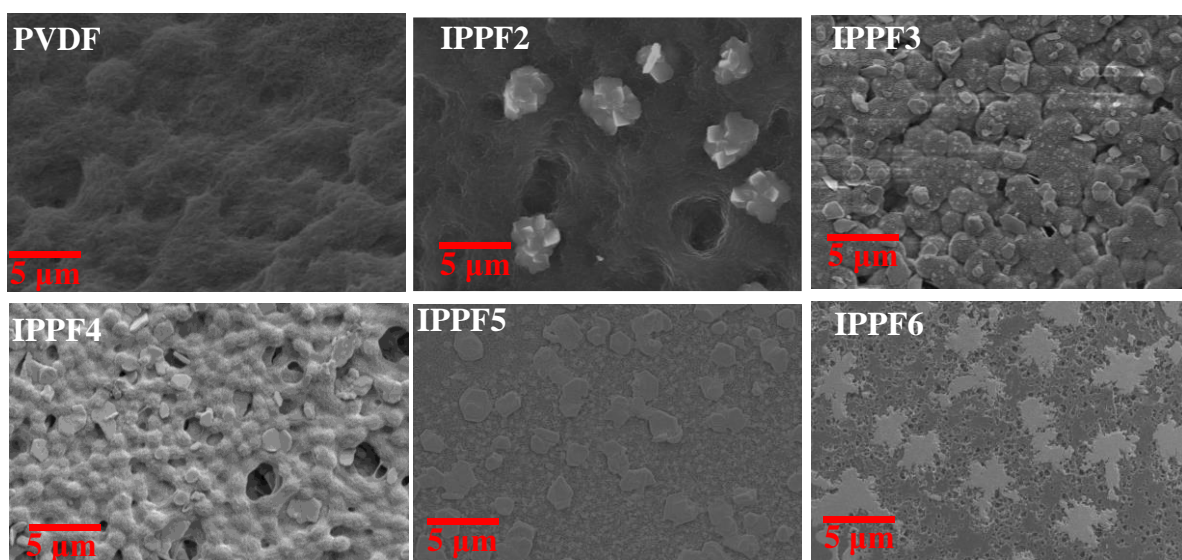

*Figure S3: FESEM image of (a) pristine PVDF and (b) IPPF2, (c) IPPF3, (d) IPPF4, (e) IPPF5, (f) IPPF6.*

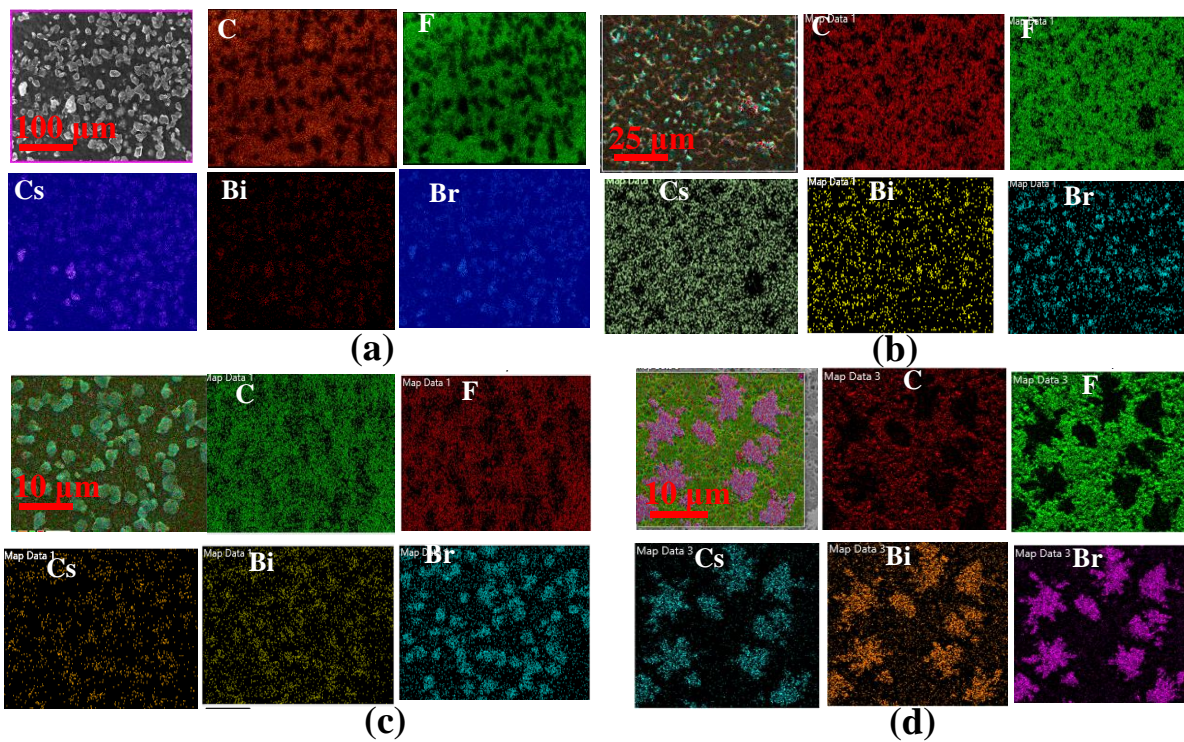

*Figure S4: EDX mapping of the composite films (a) IPPF2, (b) IPPF3, (c) IPPF5, (d) IPPF6.*

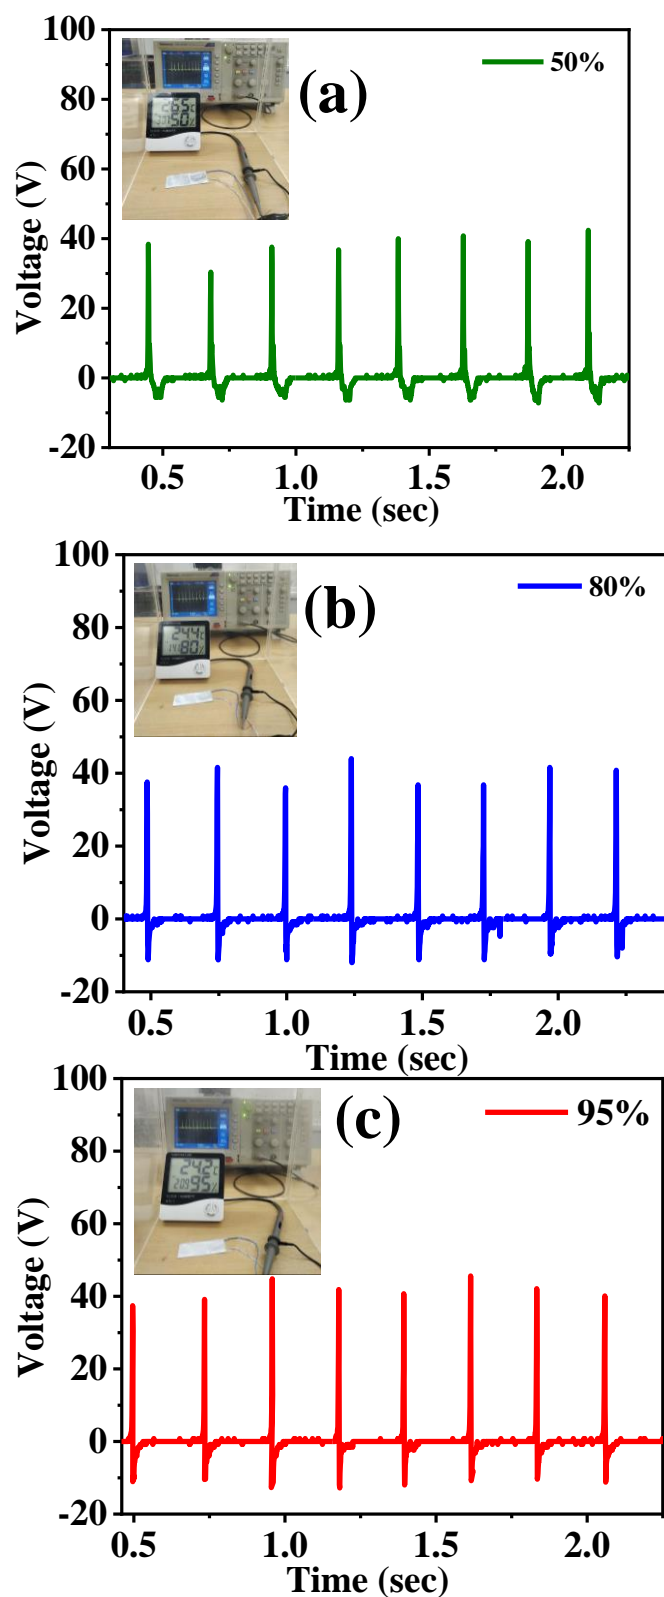

**Figure S5:** The performance of the nanogenerator with the humidity of the environment from (a) 50% to (b) 80%, and finally to (c) 95%. Inset shows real-time images of the operation of the nanogenerator device in controlled humidity conditions.

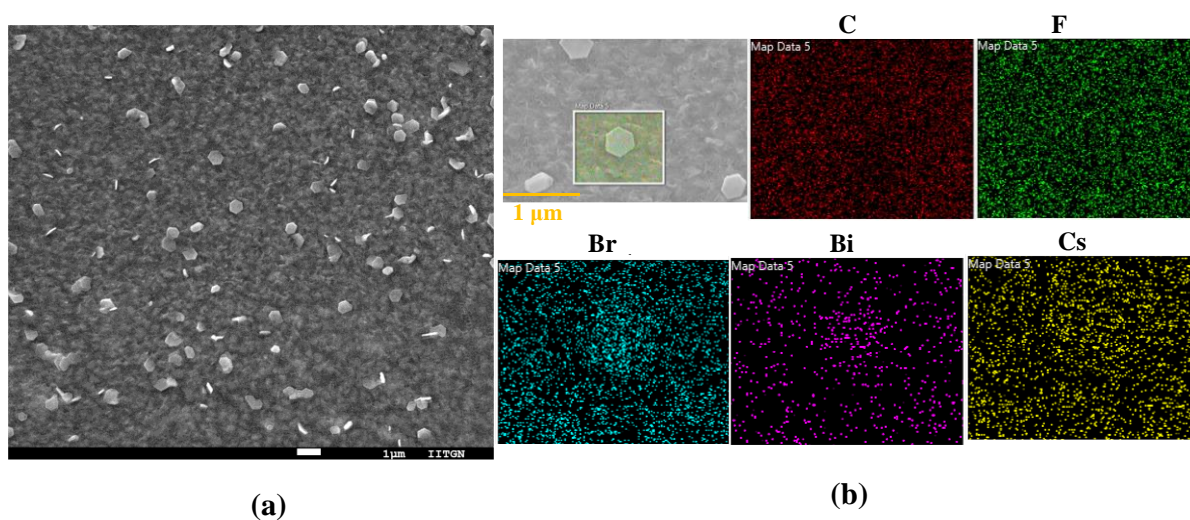

**Figure S6:** (a) FESEM image and (b) EDX mapping of IPPF4 after long cycle operation.

**Table S1: Piezoelectric co-efficient comparison**

| Material                                                          | Piezoelectric constant<br>( $d_{33}$ ) (pC/N) | References       |
|-------------------------------------------------------------------|-----------------------------------------------|------------------|
| $\text{CH}_3\text{NH}_3\text{PbI}_3$                              | 5.12                                          | 1                |
| ZnO                                                               | 3                                             | 2                |
| GaN                                                               | 3.1                                           | 3                |
| PZT                                                               | 290                                           | 4                |
| $\text{BaTiO}_3$                                                  | 190                                           | 5                |
| $\text{LiNbO}_3$                                                  | 11                                            | 6                |
| $\text{K}_{0.8}\text{Na}_{0.2}\text{NbO}_3$                       | 110                                           | 7                |
| FAPbBr <sub>3</sub>                                               | 25                                            | 8                |
| MDABCO- $\text{NH}_4\text{I}_3$                                   | 14                                            | 9                |
| (4-aminotetrahydropyran)2PbBr <sub>4</sub>                        | 76                                            | 10               |
| <b>Insitu PVDF@<math>\text{Cs}_3\text{Bi}_2\text{Br}_9</math></b> | <b>10</b>                                     | <b>This work</b> |

**Table S2: Nanogenerator performance comparison**

| Polymer                   | Filler/<br>Device<br>structure                                 | Pressure/<br>Force                    | Output<br>voltage | Current<br>/<br>Current<br>density | Application                                                 | Stability<br>/<br>Cycle              | Ref.                 |
|---------------------------|----------------------------------------------------------------|---------------------------------------|-------------------|------------------------------------|-------------------------------------------------------------|--------------------------------------|----------------------|
| PVDF                      | FAPbBr <sub>3</sub>                                            | Finger<br>impacting                   | 26.2 V            | 2.1 μA                             | LCD<br>screen,<br>speaker etc.                              | 4 weeks                              | 11                   |
| PVDF                      | BaTi <sub>(1-x)</sub> Zr <sub>x</sub> O <sub>3</sub><br>(BTZO) |                                       | 11.9 V            | 1.35 μA                            |                                                             |                                      | 12                   |
| PVDF -<br>TrFE)           | CsPbBr <sub>3</sub><br>QDs                                     | 0.6 MPa                               | 11.5 V            |                                    | Powering<br>LEDs                                            | 1200<br>cycles                       | 13                   |
| PEDOT -<br>coated<br>PVDF |                                                                | 8.3 kPa                               | 48 V              | 6 μA                               | Weight<br>Measureme<br>nt Mapping,<br>Vibration<br>Sensor   | 21000<br>cycles                      | 14                   |
| PDMS                      | ZnSnO <sub>3</sub>                                             | Repeating<br>finger                   | 40 V              | 0.4 μA                             | Glowing of<br>LEDs                                          |                                      | 15                   |
| PVDF                      | DNA                                                            | 13 kPa                                | 6 V               | 0.088<br>μA                        | Glowing of<br>LEDs                                          |                                      | 16                   |
| PDMS                      | PZT                                                            | Bending                               | 10 V              | 1.3 μA                             | Glowing of<br>LEDs                                          | 3 days /<br>6000<br>cycle            | 17                   |
| PVDF                      | MAPbBr <sub>3</sub>                                            | Finger<br>touch                       | 5 V               | 60 nA                              | Responses<br>observed<br>from NG as<br>different<br>letters | 3600<br>cycles                       | 18                   |
| PDMS                      | FAPbBr <sub>3</sub>                                            |                                       | 8.5 V             | 3.8<br>μA/cm <sup>2</sup>          |                                                             |                                      | 19                   |
| <b>PVDF</b>               | <b>Cs<sub>3</sub>Bi<sub>2</sub>Br<sub>9</sub></b>              | <b>Biomecha<br/>nical<br/>Motions</b> | <b>40 V</b>       | <b>4.1 μA</b>                      | <b>LED<br/>glowing</b>                                      | <b>1000<br/>cycles/ 6<br/>months</b> | <b>This<br/>work</b> |

**Table S3: Different configurations of a single strand of  $\beta$ -PVDF and the perovskite interface for the Bi and CsBr<sub>3</sub> terminations of the (0001) surface of Cs<sub>3</sub>Bi<sub>2</sub>Br<sub>9</sub>.**

| Interface Configuration                                                             | Binding energy (eV/monomer) |
|-------------------------------------------------------------------------------------|-----------------------------|
| <b>Bi-termination</b>                                                               |                             |
| 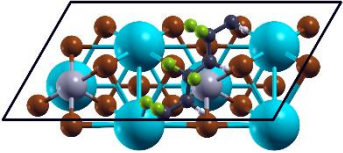   | 1.13                        |
|    | -0.70                       |
|   | -0.66                       |
|  | -0.56                       |
|  | -0.53                       |
| <b>CsBr<sub>3</sub> termination</b>                                                 |                             |
|  | -2.13                       |
|  | -1.81                       |

|                                                                                   |              |
|-----------------------------------------------------------------------------------|--------------|
| 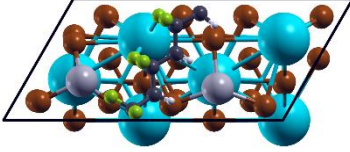 | <b>-1.59</b> |
|  | <b>-1.12</b> |
|  | <b>-0.45</b> |

## References:

1. Y. J. Kim, T. V. Dang, H. J. Choi, B. J. Park, J. H. Eom, H. A. Song, D. Seol, Y. Kim, S. H. Shin, J. Nah, *J. Mater. Chem. A*, 4 (2016) 756.
2. N. H. Langton, D. Matthews, *Br. J. Appl. Phys.*, 9 (1958) 453.
3. C. M. Lueng, H. L. W. Chan, C. Surya, C. L. Choy, *J. Appl. Phys.*, 88 (2000) 5360.
4. B. Jaffe, *J. Am. Ceram. Soc.*, 41 (1958) 494.
5. A. G. Chynoweth, *J. Appl. Phys.* 27 (1956) 78.
6. L. A. Reznitchenko, A. V. Turik, E. M. Kuznetsova, V. P. Sakhnenko, *J. Phys.: Condens. Matter*, 13 (2001) 3875.
7. H. Tian, C. Hu, X. Meng, Z. Zhou, G. Shi, *J. Mater. Chem. C*, 3 (2015) 9609.
8. A. A. Zhumekenov, M. I. Saidaminov, M. A. Haque, E. Alarousu, S. P. Sarmah, B. Murali, I. Dursun, X.-H. Miao, A. L. Abdelhady, T. Wu, O. F. Mohammed, O. M. Bakr, *ACS Energy Lett.*, 1 (2016) 32.
9. J. Young, J. M. Rondinelli, *Phys. Rev. Mater.*, 2 (2018) 065406.



10. X.-G. Chen, X.-J. Song, Z.-X. Zhang, P.-F. Li, J.-Z. Ge, Y.-Y. Tang, J.-X. Gao, W.-Y. Zhang, D.-W. Fu, Y.-M. You, *J. Am. Chem. Soc.*, 142 (2019) 1077.
11. S. K. Si, S. Paria, S. K. Karan, S. Ojha, A. K. Das, A. Maitra, A. Bera, L. Halder, A. De, and B. B. Khatua, *Nanoscale*, 12 (2020) 7214.
12. N. R. Alluri, B. Saravanakumar and S. J. Kim, *ACS Appl. Mater. Interfaces*, 7 (2015) 9831.
13. J. Nie, L. Zhu, W. Zhai, A. Berbille, L. Li and Z.L. Wang, *ACS Applied Electronic Materials*, 3 (2021), 2136.
14. K. Maity, and D. Mandal, *ACS Appl. Mater. Interfaces*, 10 (2018) 18257
15. M.M. Alam, S.K. Ghosh, A. Sultana, and D. Mandal, *Nanotechnology*, 26 (2015) 165403.
16. A. Tamang, S.K. Ghosh, S. Garain, M.M. Alam, J. Haeberle, K. Henkel, D. Schmeisser, and D. Mandal, *ACS Appl. Mater. Interfaces*, 7 (2015) 16143.
17. K.I. Park, C.K. Jeong, J. Ryu, G.T. Hwang, and K. J. Lee, *Advanced Energy Materials*, 3 (2013) 1539.
18. A. Sultana, M.M. Alam, P. Sadhukhan, U.K. Ghorai, S. Das, T.R. Middy, and D. Mandal, *Nano Energy*, 49 (2018) 380.
19. R. Ding, H. Liu, X. Zhang, J. Xiao, R. Kishor, H. Sun, B. Zhu, G. Chen, F. Gao, X. Feng and J. Chen, *Adv. Funct. Mater.*, 26 (2016) 7708.
